# Supplementary material
Source: PubMed Central journal article supplement (PMC1989732)
Supplement: pbio.0050233.sg002.pdf [file pbio.0050233.sg002.pdf]

10  $\mu\text{m}$

$-2\sigma$   
 $-1\sigma$   
 $\mu$   
 $1\sigma$   
 $2\sigma$

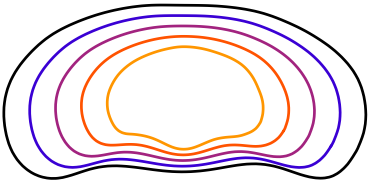

**Shape Mode 1**  
(73.9% of total variance)

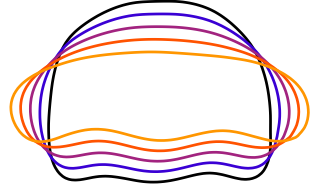

**Shape Mode 2**  
(19.6% of total variance)

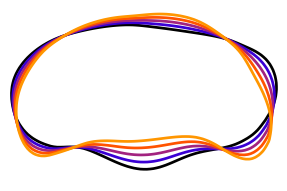

**Shape Mode 3**  
(2.9% of total variance)
