# Supplementary material
Source: PubMed Central journal article supplement (PMC1989732)

Phase

EGFP-VASP

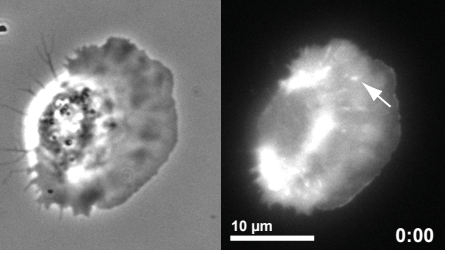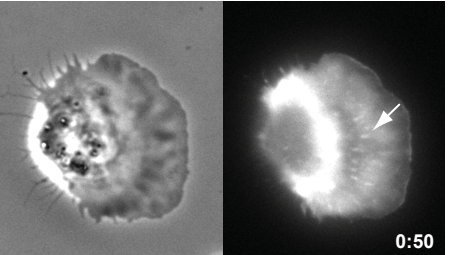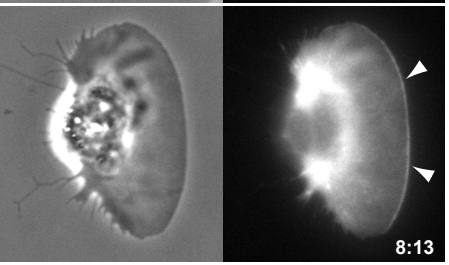

Supplement: pbio.0050233.sg001.pdf [file pbio.0050233.sg001.pdf]

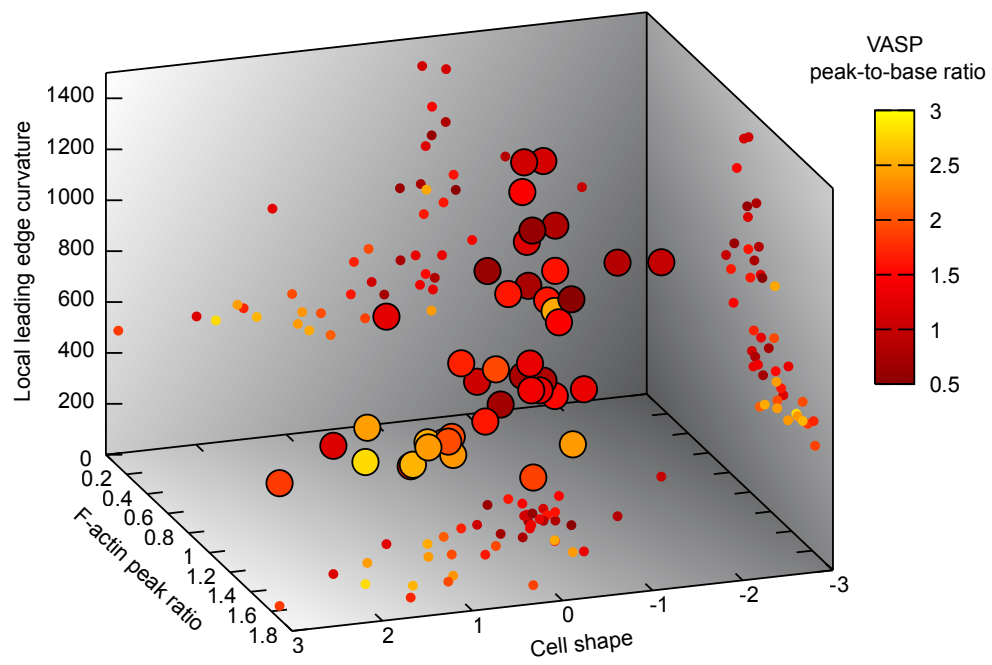

Supplement: pbio.0050233.sg003.pdf [file pbio.0050233.sg003.pdf]
